# Supplementary material for: Edible Fruits from the Ecuadorian Amazon: Ethnobotany, Physicochemical Characteristics, and Bioactive Components
Source: MDPI journal article supplement (doi:10.3390/plants12203635), 2023-10-21
Supplement: s1 [file s1]

## Supplementary Material

**Table S1. Ethnobotanical information on edible fruits of the Ecuadorian Amazon**

| Nº               | Scientific name                                        | Vernacular name                                                                                                                                                                  | Location reported in Ecuador (Province) | Use                                 | Part of fruit used | Consumption form                                                                                                                                                                                                                                                                                     | Origin*                | Source |
|------------------|--------------------------------------------------------|----------------------------------------------------------------------------------------------------------------------------------------------------------------------------------|-----------------------------------------|-------------------------------------|--------------------|------------------------------------------------------------------------------------------------------------------------------------------------------------------------------------------------------------------------------------------------------------------------------------------------------|------------------------|--------|
| <b>ARECACEAE</b> |                                                        |                                                                                                                                                                                  |                                         |                                     |                    |                                                                                                                                                                                                                                                                                                      |                        |        |
| 1                | <i>Aphandra natalia</i> (Balslev & A.J. Hend.) Barfod  | Tagua, marfil vegetal, Chilli, Chilli-punsch, Chiri'si, Fibra, Kinchuk, Kintiuk Sili, Tindiuqui, Tintiuk, Wamowe (Ecuador) and Piassaba, Piassaba, Piassava                      | Pastaza                                 | Food, materials                     | Pulp, seed         | Mesocarp is eaten like fresh fruit or after boiling, the immature endosperm is consumed as a beverage and the seed is used like vegetable ivory (local name "Tagua") to manufacture buttons and carvings                                                                                             | Native, cultivated     | [1–3]  |
| 2                | <i>Attalea colenda</i> (O.F. Cook) Balslev & A.J. Hend | Palma real                                                                                                                                                                       | Amazon                                  | Food, medicine                      | NR                 |                                                                                                                                                                                                                                                                                                      | Native, cultivated     | [4]    |
| 3                | <i>Bactris gasipaes</i> Kunth                          | Chonta, chontaduro, peach palm, persikopalm o pupunh, hontaduro, pejiballe, acana o pupunha<br>Chonta, Chonta dura, Chontaduro, Chonta palm, Palmito, Puka chunta, Shalin chunta | Orellana                                | Cultural, food, materials, medicine | Pulp, seed         | Roasted or cooked fruit, flour, non-alcoholic or fermented alcoholic beverage called chicha.<br>Juices, canned goods, jams, and preserves, animal feed, hunting and fishing bait, and fish poison mixed with <i>Clibadium surinamense</i> leaves. Its oil is used as a cosmetic, lubricant, and soap | Introduced, cultivated | [5–8]  |

|                 |                                          |                                                                                            |                                    |                                           |                   |                                                                                                                                                            |                        |             |
|-----------------|------------------------------------------|--------------------------------------------------------------------------------------------|------------------------------------|-------------------------------------------|-------------------|------------------------------------------------------------------------------------------------------------------------------------------------------------|------------------------|-------------|
|                 |                                          |                                                                                            |                                    |                                           |                   | for human consumption. The seed is used in handicrafts.                                                                                                    |                        |             |
| 4               | <i>Bactris maraja</i> Mart.              | Chontilla                                                                                  | Amazon                             | Food, medicine                            | Whole fruit, seed |                                                                                                                                                            | Native                 | [4]         |
| 5               | <i>Cocos nucifera</i> L.                 | Coco                                                                                       | Orellana, Sucumbios                | Medicine                                  | Pulp, Seed        | Candies, juices, coconut milk, coconut water                                                                                                               | Introduced, cultivated | [4,5]       |
| 6               | <i>Desmoncus orthacanthos</i> Mart.      | Vara waska, tu'tu , yeyedokame                                                             | Amazon                             | Feed, Medicine                            | Whole fruit       | Fresh fruit                                                                                                                                                | Native                 | [4]         |
| 7               | <i>Euterpe oleracea</i> Mart.            | Asaí, azaí, huasaí, palma murrapo, naidí, or generally acai                                | Amazon                             | Food, medicine                            | Pulp              | Fresh fruit                                                                                                                                                | Native                 | [5]         |
| 8               | <i>Mauritia flexuosa</i> L.f.            | Aguaje, buriti, morete, moriche o muriti, canangucha, caranday-guazu, palma real, ite palm | Napo, Orellana, Pastaza, Sucumbios | Cultural, food, feed, materials, medicine | Pulp, seed        | Fresh and cooked fruit, for oil extraction, preparation of non-fermented and fermented beverages, creams, jellies and jams.                                | Native, cultivated     | [9–11]      |
| 9               | <i>Mauritiella armata</i> (Mart.) Burret | Wichilla morete                                                                            | Amazon                             | Feed, food medicine                       | Whole fruit       | Fresh fruit                                                                                                                                                | Native                 | [4]         |
| 10              | <i>Oenocarpus bataua</i> Mart.           | Bataua, chapil, patawa, patauá, seje, mil pesos, ungurahua o ungurahui                     | Napo, Sucumbios                    | Cultural, food, materials, medicine       | Pulp, pell, seed  | Fresh or cooked fruit, in iced preparations, unfermented and fermented beverages such as chicha, for the extraction of oil, which is used as a hair tonic. | Native, cultivated     | [4–6,12,13] |
| <b>RUTACEAE</b> |                                          |                                                                                            |                                    |                                           |                   |                                                                                                                                                            |                        |             |
| 11              | <i>Citrus x paradisi</i> Macfad          | Pomelo                                                                                     | Orellana, Sucumbios                | Food                                      | Pulp              | Fresh fruit                                                                                                                                                | Introduced, cultivated | [5]         |
| 12              | <i>Citrus aurantifolia</i> Swingle       | Limón                                                                                      | Amazon                             | Medicine                                  | Pulp              | Preparations whith juice and other specie                                                                                                                  | Introduced, cultivated | [14]        |

|                  |                                                             |                                                                      |                            |                      |             |                                                                                        |                        |         |
|------------------|-------------------------------------------------------------|----------------------------------------------------------------------|----------------------------|----------------------|-------------|----------------------------------------------------------------------------------------|------------------------|---------|
| 13               | <i>Citrus reticulata</i> Blanco                             | Mandarina                                                            | Orellana, Sucumbios        | Food                 | Pulp        | Fresh fruit                                                                            | Introduced, cultivated | [5]     |
| 14               | <i>Citrus x aurantium</i> L.                                | Limon                                                                | Orellana, Sucumbios        | Food                 | Pulp        | Fresh fruit                                                                            | Introduced, cultivated | [5]     |
| 15               | <i>Citrus x sinensis</i> (L.) Osbeck                        | Naranja                                                              | Orellana, Sucumbios        | Food                 | Pulp        | Fresh fruit                                                                            | Introduced, cultivated | [5]     |
| <b>MALVACEAE</b> |                                                             |                                                                      |                            |                      |             |                                                                                        |                        |         |
| 16               | <i>Gossypium barbadense</i> L.                              | Algodon, Uruch                                                       | Amazon                     | Medicine             | Whole fruit | Roasted fruit extract                                                                  | Native, cultivated     | [14]    |
| 17               | <i>Matisia cordata</i> Bonpl.                               | Zapote                                                               | Orellana, Sucumbios        | Feed, food           | Pulp        | Fresh fruit                                                                            | Native, cultivated     | [5]     |
| 18               | <i>Theobroma bicolor</i> Bonpl.                             | Cacao blanco, árbol patas, sus semillas conocidas como patas-muyo    | Napo, Orellana, Sucumbios  | Food                 | Pulp, seed  | Fresh pulp, roasted seed                                                               | Introduced, cultivated | [8,15]  |
| 19               | <i>Theobroma grandiflorum</i> (Willd. ex Spreng.) K. Schum. | Copoazú                                                              | Amazon                     | Food, medicine       | Pulp, seed  | Fres fruit, like cosmetic, chocolate, beverage, liquor, and food                       | Introduced, cultivated | [5]     |
| 20               | <i>Theobroma cacao</i> L                                    |                                                                      | Orellana, Zamora Chinchipe | Food, materials      | Pulp, seed  | Fresh fruit, chocolate                                                                 | Native, cultivated     | [16,17] |
| <b>MYRTACEAE</b> |                                                             |                                                                      |                            |                      |             |                                                                                        |                        |         |
| 21               | <i>Eugenia malaccensis</i> L                                | Pomarrosa                                                            | Orellana, Sucumbios        | Food                 | Whole fruit | Fresh fruit                                                                            | Introduced, cultivated | [5]     |
| 22               | <i>Eugenia stipitate</i> McVaugh                            | pa, Quince, Amazonic guava,                                          | Amazon                     | Food, medicine       | Pulp        | Fresh fruit, juice                                                                     | Native, cultivated     | [5,18]  |
| 23               | <i>Myrciaria dubia</i> (Kunth) McVaugh                      | Camu-camu, caçari, arazá de agua, guayabo, guayabito, guapuro blanco | Amazon                     | Feed, food, medicine | pulp, pell  | Extract, juices, nectars, yogurts, ice cream, jams, alcoholic beverages or soft drinks | Native                 | [5,10]  |

|                |                                               |                                                                           |                                               |                |                  |                                              |                        |              |
|----------------|-----------------------------------------------|---------------------------------------------------------------------------|-----------------------------------------------|----------------|------------------|----------------------------------------------|------------------------|--------------|
| 24             | <i>Psidium guayava</i> Raddi                  | Kirim, guayaba                                                            | Morona Santiago, Orellana, Pastaza, Sucumbios | Food, medicine | Whole fruit      | Fresh fruit, decoction                       | Native, cultivated     | [5]          |
| MORACEAE       |                                               |                                                                           |                                               |                |                  |                                              |                        |              |
| 25             | <i>Artocarpus altilis</i> (Parkinson) Fosberg | Fruta de pan                                                              | Orellana, Sucumbios                           | Food           | Seed             | Fresh fruit                                  | Cultivated             | [5]          |
| 26             | <i>Artocarpus heterophyllus</i> Lam.          | Fruta de jaca                                                             | Orellana, Sucumbios                           | Food           | Pulp             | Fresh fruit                                  |                        | [5]          |
| 27             | <i>Ficus carica</i> L.                        | Higo                                                                      | Orellana, Sucumbios                           | Food           | Whole fruit      | Fresh fruit                                  | Introduced, cultivated | [5]          |
| PASSIFLORACEAE |                                               |                                                                           |                                               |                |                  |                                              |                        |              |
| 28             | <i>Passiflora edulis</i> Sims.                | Maracuyá                                                                  | Orellana, Sucumbios                           | Food           | Pulp             | Fresh fruit                                  | Introduced, cultivated | [5]          |
| 29             | <i>Passiflora incarnata</i> L.                | Granadilla silvestre                                                      | Orellana, Sucumbios                           | Food           | Pulp             | Fresh fruit                                  |                        | [5]          |
| 30             | <i>Passiflora quadrangularis</i> L.           | Badea                                                                     | Orellana, Sucumbios                           | Food           | Pulp             | Fresh fruit                                  | Native                 | [5]          |
| LECYTHIDACEAE  |                                               |                                                                           |                                               |                |                  |                                              |                        |              |
| 31             | <i>Grias neuberthii</i> J.F. Macbr.           | Pitón                                                                     | Orellana                                      | Food           | Pulp             | Fresh fruit or roasted                       | Native, cultivated     | [8]          |
| 32             | <i>Gustavia macarenensis</i> Philipson        | Alan paso, Inaco, Inak, Passo, Sachu pasu y, en el presente estudio, Pasu | Napo, Orellana, Sucumbios                     | Food, medicine | Pulp, pell, seed | Juice, and oil                               | Native                 | [5,8,13, 19] |
| RUBIACEAE      |                                               |                                                                           |                                               |                |                  |                                              |                        |              |
| 33             | <i>Borojoa patinoi</i> Cuatrec.               | Borojo                                                                    | Orellana, Sucumbios                           | Food           | Pulp             | Fresh fruit, energizing, jam and vinaigrette | Native                 | [5]          |
| 34             | <i>Morinda citrifolia</i> L.                  | Noni                                                                      | Amazon                                        | Food           | Pulp             | Fresh fruit                                  |                        | [5]          |
| SAPINDACEAE    |                                               |                                                                           |                                               |                |                  |                                              |                        |              |
| 35             | <i>Nephelium lappaceum</i> Poir.              | Achotillo, Rambután                                                       | Orellana, Sucumbios                           | Food           | Pulp             | Fresh fruit                                  | Introduced             | [5]          |
| SOLANACEAE     |                                               |                                                                           |                                               |                |                  |                                              |                        |              |

|               |                                                  |                                           |                                                  |                |             |                                      |                        |         |
|---------------|--------------------------------------------------|-------------------------------------------|--------------------------------------------------|----------------|-------------|--------------------------------------|------------------------|---------|
| 36            | <i>Solanum quitoense</i> var. <i>palora</i> Lam. | Naranjilla                                | Napo, Orellana, Sucumbios                        | Food           | Whole fruit | Fresh fruit, juice                   | Native, cultivated     | [18,20] |
| 37            | <i>Solanum sessiliflorum</i> Dunal               | Cocona                                    | Amazon                                           | Food, medicine | pulp, pell  | Fresh fruit                          | Native, cultivated     | [5]     |
| ANNONACEAE    |                                                  |                                           |                                                  |                |             |                                      |                        |         |
| 38            | <i>Annona cherimola</i> Mill.                    | Chirimoya                                 | Orellana, Sucumbios                              | Food           | Pulp        | Fresh fruit                          | Native, cultivated     | [5]     |
| 39            | <i>Annona muricata</i> L.                        | Guanábana                                 | Orellana, Sucumbios                              | Food           | Pulp        | Fresh fruit                          | Native, cultivated     | [5]     |
| BROMELIACEAE  |                                                  |                                           |                                                  |                |             |                                      |                        |         |
| 40            | <i>Ananas comosus</i> (L.) Merr.                 | Piña                                      | Orellana, Sucumbios                              | Food           | Pulp        | Fresh fruit                          | Introduced, cultivated | [5]     |
| ANACARDIACEAE |                                                  |                                           |                                                  |                |             |                                      |                        |         |
| 41            | <i>Anacardium occidentale</i> L.                 | Marañon                                   | Orellana, Sucumbios                              | Food           | Pulp, seed  | Fresh fruit, juice                   | Introduced             | [5]     |
| 52            | <i>Spondias mombin</i> L.                        | Hobo                                      | Orellana, Sucumbios                              | Food, medicine |             | Fresh fruit                          | Native, cultivated     | [5]     |
| OXALIDACEAE   |                                                  |                                           |                                                  |                |             |                                      |                        |         |
| 43            | <i>Averrhoa carambola</i> L.                     | Carambola                                 | Orellana, Sucumbios                              | Food           | Whole fruit | Fresh fruit                          | Introduced, cultivated | [5]     |
| CARICACEAE    |                                                  |                                           |                                                  |                |             |                                      |                        |         |
| 44            | <i>Carica papaya</i> L.                          | Papaya                                    | Orellana, Sucumbios                              | Food           | Pulp        | Fresh fruit                          | Native, cultivated     | [21]    |
| BURSERACEAE   |                                                  |                                           |                                                  |                |             |                                      |                        |         |
| 45            | <i>Dacryodes peruviana</i> (Loes.) H.J. Lam      | Copal, copal comestible, anime, wigonkawé | Morona Santiago, Napo, Pastaza, Zamora Chinchipe | Feed, food     | Whole fruit | Fresh fruit, feed for monkeys, birds | Native                 | [22]    |
| CACTACEAE     |                                                  |                                           |                                                  |                |             |                                      |                        |         |

|                |                                                                |                                                                                                                                                                        |                                      |                       |             |                                                                                                                                                                           |                        |         |
|----------------|----------------------------------------------------------------|------------------------------------------------------------------------------------------------------------------------------------------------------------------------|--------------------------------------|-----------------------|-------------|---------------------------------------------------------------------------------------------------------------------------------------------------------------------------|------------------------|---------|
| 46             | <i>Hylocereus megalanthus</i> (K. Schum. ex Vaupel) Ralf Bauer | Yellow pitahaya                                                                                                                                                        | Morona Santiago, Orellana, Sucumbíos | Food                  | Pulp        | Fresh fruit                                                                                                                                                               | Introduced, cultivated | [5,23]  |
| FABACEAE       |                                                                |                                                                                                                                                                        |                                      |                       |             |                                                                                                                                                                           |                        |         |
| 47             | <i>Inga edulis</i> Mart.                                       | Guaba                                                                                                                                                                  | Orellana, Sucumbios                  | Food                  | Arilo       | Fresh fruit                                                                                                                                                               | Native, cultivated     | [5]     |
| ACHARIACEAE    |                                                                |                                                                                                                                                                        |                                      |                       |             |                                                                                                                                                                           |                        |         |
| 48             | <i>Mayna yasuniana</i> Á.J. Pérez, Liesner & D. Santam.        | Huaorani: dakatoguawe, numayabo, yepenemoncamo                                                                                                                         | Orellana                             | Food, medicine        | Pulp        | Fresh fruit                                                                                                                                                               | 47                     | [24]    |
| NYCTAGINACEAE  |                                                                |                                                                                                                                                                        |                                      |                       |             |                                                                                                                                                                           |                        |         |
| 49             | <i>Neea sp.</i> Ruiz & Pav.                                    | NA                                                                                                                                                                     | Orellana                             | Medicine              | Whole fruit | Fruit chewing to prevent cavities                                                                                                                                         | Native                 | [25]    |
| LAURACEAE      |                                                                |                                                                                                                                                                        |                                      |                       |             |                                                                                                                                                                           |                        |         |
| 50             | <i>Persea americana</i> Mill.                                  | Aguacate                                                                                                                                                               | Orellana, Sucumbios                  | Food                  | Pulp        | Fresh fruit                                                                                                                                                               | Native, cultivated     | [5]     |
| PHYLLANTHACEAE |                                                                |                                                                                                                                                                        |                                      |                       |             |                                                                                                                                                                           |                        |         |
| 51             | <i>Phyllanthus acidus</i> (L.) Skeels.                         | Grosella                                                                                                                                                               | Orellana, Sucumbios                  | Food                  |             | Fresh fruit                                                                                                                                                               | Introduced, cultivated | [5]     |
| EUPHORBIACEAE  |                                                                |                                                                                                                                                                        |                                      |                       |             |                                                                                                                                                                           |                        |         |
| 52             | <i>Plukenetia volubilis</i> L.                                 | Sacha inchi, sacha yachi, sacha yuchi, sacha yuchiqui, yuchi, sampannankii, suwaa, correa, amaebe, amui-o, maní de arbol, maní del monte, maní estrella, nuez del inca | Amazon                               | Feed, food, materials | Seed        | Roasted seeds, salted or covered in chocolate, pressed for oil, or ground to a buttery substance. Proces products like protein powder or flour, nanoparticles and biofuel |                        | [26,27] |
| URTICACEAE     |                                                                |                                                                                                                                                                        |                                      |                       |             |                                                                                                                                                                           |                        |         |

|                   |                                              |               |                     |      |             |             |                        |       |
|-------------------|----------------------------------------------|---------------|---------------------|------|-------------|-------------|------------------------|-------|
| 53                | <i>Pourouma cecropiifolia</i> Mart.          | Uva de árbol  | Orellana, Sucumbios | Food | Whole fruit | Fresh fruit | Native, cultivated     | [5]   |
| <b>SAPOTACEAE</b> |                                              |               |                     |      |             |             |                        |       |
| 54                | <i>Pouteria caimito</i> (Ruiz & Pav.) Radlk. | Caimito, avío | Orellana, Sucumbios | Food | Pulp        | Fresh fruit | Native, cultivated     | [5,8] |
| <b>ROSACEAE</b>   |                                              |               |                     |      |             |             |                        |       |
| 55                | <i>Prunus cerasifera</i> Ehrh.               | Ciruelo       | Orellana, Sucumbios | Food | Whole fruit | Fresh fruit | Introduced, cultivated | [5]   |

\* The origin of the species was described according to the Encyclopedia of useful plants of Ecuador

The families were identified according to The Tropicos database (<https://www.tropicos.org/home>)

NR. No reported

1. Viafara, D.; Abreu-Naranjo, R.; Alvarez-Suarez, J.M.; Reyes-Mera, J.J.; Barreno-Ayala, M. Chemical Characterisation and Antioxidant Activity of Aphandra Natalia Mesocarp and Its Oil from the Amazon Region of Ecuador. *Journal of Food Measurement and Characterization* **2018**, *12*, 2835–2843, doi:10.1007/s11694-018-9898-x.
2. Kronborg, M.; Grández, C.A.; Ferreira, E.; Balslev, H. Aphandra Natalia (Arecaceae)-a Little Known Source of Piassaba Fibers from the Western Amazon. *Rev Peru Biol* **2008**, *15*, 103–113.
3. Pedersen, H.B. Production and Harvest of Fibers from Aphandra Natalia (Palmae) in Ecuador. *For Ecol Manage* **1996**, *80*, 155–161, doi:https://doi.org/10.1016/0378-1127(95)03632-6.
4. Paniagua-Zambrana, N.; Cámara-Leret, R.; Macía, M.J. Patterns of Medicinal Use of Palms Across Northwestern South America. *The Botanical Review* **2015**, *81*, 317–415, doi:10.1007/s12229-015-9155-5.
5. Vargas-Tierras, Y.B.; Prado-Beltrán, J.K.; Nicolalde-Cruz, J.R.; Casanoves, F.; Virginio-Filho, E.D.; Viera-Arroyo, W.F. Characterization and Role of Amazonian Fruit Crops in Family Farms in the Provinces of Sucumbios and Orellana (Ecuador). *REVISTA CORPOICA-CIENCIA Y TECNOLOGIA AGROPECUARIA* **2018**, *19*, 501–516, doi:10.21930/rcta.vol19\_num3\_art:812.
6. Jaramillo-Vivanco, T.; Balslev, H.; Montúfar, R.; Cámara, R.M.; Giampieri, F.; Battino, M.; Cámara, M.; Alvarez-Suarez, J.M. Three Amazonian Palms as Underestimated and Little-Known Sources of Nutrients, Bioactive Compounds and Edible Insects. *Food Chem* **2022**, *372*, 131273, doi:https://doi.org/10.1016/j.foodchem.2021.131273.

7. González-Jaramillo, N.; Bailon-Moscoso, N.; Duarte-Casar, R.; Romero-Benavides, J.C. Peach Palm (*Bactris Gasipaes* Kunth.): Ancestral Tropical Staple with Future Potential. *Plants* **2022**, *11*, doi:10.3390/plants11223134.
8. Innerhofer, S.; Bernhardt, K.-G. Ethnobotanic Garden Design in the Ecuadorian Amazon. *Biodivers Conserv* **2011**, *20*, 429–439, doi:10.1007/s10531-010-9984-9.
9. Abreu-Naranjo, R.; Paredes-Moreta, J.G.; Granda-Albuja, G.; Iturralde, G.; González-Paramás, A.M.; Alvarez-Suarez, J.M. Bioactive Compounds, Phenolic Profile, Antioxidant Capacity and Effectiveness against Lipid Peroxidation of Cell Membranes of *Mauritia Flexuosa* L. Fruit Extracts from Three Biomes in the Ecuadorian Amazon. *Heliyon* **2020**, *6*, doi:10.1016/j.heliyon.2020.e05211.
10. Arellano-Acuna, E.; Rojas-Zavaleta, I.; Maria Paucar-Menacho, L. Camu-Camu (*Myrciaria Dubia*): Tropical Fruit of Excellent Functional That Help to Improve the Quality of Life. *SCIENTIA AGROPECUARIA* **2016**, *7*, 433–443, doi:10.17268/sci.agropecu.2016.04.08.
11. Rivera, M.; Ramos, M.; Silva, M.; Briceno, J.; Alvarez, M. Effect of the Temperature Prior to Extraction on the Yield and Fatty Acid Profile of Morete Oil (*Mauritia Flexuosa* L.F.). *GRANJA-REVISTA DE CIENCIAS DE LA VIDA* **2022**, *35*, 98–111, doi:10.17163/lgr.n35.2022.08.
12. Miller, C. Fruit Production of the Ungurahua Palm (*Oenocarpus Bataua* Subsp *Bataua*, Arecaceae) in an Indigenous Managed Reserve. *Econ Bot* **2002**, *56*, 165–176, doi:10.1663/0013-0001(2002)056[0165:FPOTUP]2.0.CO;2.
13. Méndez-Durazno, C.; Cisneros-Perez, P.A.; Loja-Ojeda, B.A.; Monge-Sevilla, R.; Romero-Estévez, D.; Fernández, L.; Espinoza-Montero, P.J. Antioxidant Capacity through Electrochemical Methods and Chemical Composition of *Oenocarpus Bataua* and *Gustavia Macarenensis* from the Ecuadorian Amazon. *Antioxidants* **2023**, *12*, doi:10.3390/antiox12020318.
14. Giovannini, P. Medicinal Plants of the Achuar (Jivaro) of Amazonian Ecuador: Ethnobotanical Survey and Comparison with Other Amazonian Pharmacopoeias. *J Ethnopharmacol* **2015**, *164*, 78–88, doi:https://doi.org/10.1016/j.jep.2015.01.038.
15. Ponce-Sanchez, J.; Zurita-Benavides, M.G.; Penuela, M.C. Reproductive Ecology of White Cacao (*Theobroma Bicolor* Humb. & Bonpl.) in Ecuador, Western Amazonia: Floral Visitors and the Impact of Fungus and Mistletoe on Fruit Production. *BRAZILIAN JOURNAL OF BOTANY* **2021**, *44*, 479–489, doi:10.1007/s40415-021-00709-9.
16. Sanchez-Capa, M.; Viteri-Sanchez, S.; Burbano-Cachiguango, A.; Abril-Donoso, M.; Vargas-Tierras, T.; Suarez-Cedillo, S.; Mestanza-Ramón, C. New Characteristics in the Fermentation Process of Cocoa (*Theobroma Cacao* L.) “Super Arbol” in La Joya de Los Sachas, Ecuador. *Sustainability* **2022**, *14*, doi:10.3390/su14137564.
17. Herrera, R.; Vasquez, S.C.; Granja, F.; Molina-Muller, M.; Capa-Morocho, M.; Guaman, A.O. Interaction of N, P and K on Soil Characteristics, Growth and Quality of Cocoa Sprouts and Fruits in Ecuadorian Amazon. *BIOAGRO* **2022**, *34*, 277–288, doi:10.51372/bioagro343.7.
18. Llerena, W.; Samaniego, I.; Angós, I.; Brito, B.; Ortiz, B.; Carrillo, W. Biocompounds Content Prediction in Ecuadorian Fruits Using a Mathematical Model. *Foods* **2019**, *8*, doi:10.3390/foods8080284.



19. Mera, J.J.R.; Abreu-Naranjo, R.; Alvarez-Suarez, J.M.; Viafara, D. Chemical Characterization, Fatty Acid Profile and Antioxidant Activity of *Gustavia Macarenensis* Fruit Mesocarp and Its Oil from the Amazonian Region of Ecuador as an Unconventional Source of Vegetable Oil. *GRASAS Y ACEITES* **2019**, *70*, doi:10.3989/gya.0569181.
20. Navarrete, A.T.; Burgos, J.C. V; Quintana, Y.G.; Crespo, Y.A. Partial Chemical Composition, and Morphometric and Sensory Characteristics of Organically and Conventionally Produced Fruits of Naranjilla (*Solanum Quitoense* Var. Palora) in the Wamani Community, Ecuadorian Amazon. *Interciencia* **2018**, *43*, 115–119.
21. Tierras, Y.B. V; Martinez, A.E.D.; Yepez, C.D.C.; Jaramillo, L.A.T.; Arroyo, W.F. V Comparison of Fruit Quality Traits of Papaya (*Carica Papaya* L.) Genotypes from Shushufindi and La Joya de Los Sachas, Ecuador. *REVISTA CORPOICA-CIENCIA Y TECNOLOGIA AGROPECUARIA* **2021**, *22*, doi:10.21930/rcta.vol22\_num1\_art:1930.
22. Valarezo, E.; Ojeda-Riascos, S.; Cartuche, L.; Andrade-Gonzalez, N.; Gonzalez-Sanchez, I.; Meneses, M.A. Extraction and Study of the Essential Oil of Copal (*Dacryodes Peruviana*), an Amazonian Fruit with the Highest Yield Worldwide. *PLANTS-BASEL* **2020**, *9*, doi:10.3390/plants9121658.
23. Vargas-Tierras, Y.; Diaz, A.; Caicedo, C.; Macas, J.; Suarez-Tapia, A.; Viera, W. Benefits of Legume Species in an Agroforestry Production System of Yellow Pitahaya in the Ecuadorian Amazon. *Sustainability* **2021**, *13*, doi:10.3390/su13169261.
24. Santamaría-Aguilar, D.; Pérez, Á.J.; Liesner, R.L. Mayna Yasuniana (*Achariaceae*), Una Especie Nueva Para El Ecuador. *Neotrop Biodivers* **2017**, *3*, 50–56, doi:10.1080/23766808.2017.1283902.
25. Weckmüller, H.; Barriocanal, C.; Maneja, R.; Boada, M. Factors Affecting Traditional Medicinal Plant Knowledge of the Waorani, Ecuador. *Sustainability* **2019**, *11*, doi:10.3390/su11164460.
26. Kodahl, N. Sacha Inchi (*Plukenetia Volubilis* L.)-from Lost Crop of the Incas to Part of the Solution to Global Challenges? *Planta* **2020**, *251*, doi:10.1007/s00425-020-03377-3.
27. Fukalova-Fukalova, T.; Castillo, J.; Parreño, K.; Gaibor, M.; Londoño-Larrea, P. Preliminary Studies of Performance and Lipid Profiles of Ecuadorian *P. Volubilis* L. as Contribution to Agricultural Innovation. In Proceedings of the Smart Innovation, Systems and Technologies; 2022; Vol. 252, pp. 151–163.
